1 **Study Protocol**

2 Maternity care professionals' preparedness for and experiences of screening  
3 and responding to disclosures of domestic violence in the peripartum period: a  
4 protocol for a qualitative evidence synthesis

5 Laura O'Shea <sup>1,2\*</sup>¶, Melissa Corbally <sup>1,2</sup>¶, Déirdre Daly<sup>1,2</sup> ¶

6 <sup>1</sup> School of Nursing & Midwifery, Faculty of Health Sciences, Trinity College Dublin, Dublin, Ireland

7 <sup>2</sup>Trinity Centre for Maternity Care Research (TCMCR) School of Nursing & Midwifery, Faculty of  
8 Health Sciences, Trinity College Dublin, Dublin, Ireland

9 [\\*osheal3@tcd.ie](mailto:osheal3@tcd.ie) (LOS)

10 Orchid ID <https://orcid.org/0009-0005-4951-0348>

11 ¶ These authors contributed equally to this work.

12

13

14

15

16

17

18

19

20

21

22

23

24

25

26

27

28 Maternity care professionals' preparedness for and experiences of screening and  
29 responding to disclosures of domestic violence in the peripartum period: a protocol for a  
30 qualitative evidence synthesis

31

32 **Funding**

33 None

34 **Declaration of Competing Interest**

35 None declared

36 **Data availability**

37 **Underlying data**

38 No data are associated with this article

39 Registered on PROSPERO International prospective register of systematic reviews on

40 30/9/23

41 Available from

42 [https://www.crd.york.ac.uk/prospero/display\\_record.php?ID=CRD42023464776](https://www.crd.york.ac.uk/prospero/display_record.php?ID=CRD42023464776)

43 **Reporting guidelines**

44 Open Science Framework: Prisma-P checklist for Maternity care professionals' preparedness  
45 for and experiences of screening and responding to disclosures of domestic violence in the  
46 peripartum period: a protocol for a qualitative evidence synthesis.

47

48 **Abstract**

49 **Background:** Maternity care professionals, such as midwives, public health nurses, doctors,  
50 and social workers, are in the unique position of having regular contact with women in the  
51 peripartum period. They are well-placed to recognise and respond to disclosures of domestic  
52 violence, however many lack confidence and feel unprepared for this in practice. While there  
53 are screening tools used for enquiry about domestic violence in pregnancy, there are  
54 variations in the tools used, the frequency and timing of enquiry, and the response/referral  
55 pathways across professions. Research exists on the role of health care professionals such as  
56 midwives, doctors, and nurses with regards to domestic violence, however little is understood  
57 about the collective and shared experience of maternity care professionals who screen for  
58 and respond to domestic violence in the peripartum period.

59 **Methods:** A qualitative evidence synthesis of maternity care professionals' preparedness for  
60 and experiences of screening and responding to disclosures of domestic violence in the  
61 peripartum period will be conducted. Qualitative studies of any design, and mixed method  
62 and other design studies where qualitative data can be extracted will be considered for  
63 inclusion. A systematic search of the following electronic bibliographic databases will be  
64 conducted: ASSIA, CINAHL, EMBASE, Maternity and Infant Care, MEDLINE, PsycINFO and  
65 SocINDEX. The Critical Skills Appraisal Programme (CASP) qualitative studies tool will be used  
66 to assess methodological quality of included studies. Data synthesis will involve three  
67 sequential stages, coding, development of descriptive themes and generation of analytical  
68 themes. Confidence in findings will be assessed using the Grading of Recommendations  
69 Assessment, Development and Evaluation-Confidence in the Evidence from Reviews of  
70 Qualitative research (GRADE-CERQual) tool.

71 **Discussion:** This QES will provide a deeper understanding of maternity care professionals'  
72 preparedness for and experiences of screening and responding to domestic violence  
73 disclosures in the peripartum period. The findings will, potentially, identify what aspects of  
74 education and preparedness work well and what might be improved.

75 **Keywords**

76 Maternity care professional, midwife, doctor, public health nurse, social worker, experience,  
77 screening, disclosure, domestic violence, intimate partner violence, domestic abuse,  
78 peripartum, pregnancy, qualitative

79

80

81

82

83

84

85

86

87

88

89

90

## 91 **Introduction**

92 Domestic violence, also called intimate partner violence (IPV) or domestic abuse, refers to  
93 physical, emotional, sexual, and financial abuse within close adult relationships, most often  
94 intimate partner relationships. It also encompasses abuse in the form of coercive and  
95 controlling behaviours [1]. Domestic violence is addressed in international and national  
96 legislation to varying degrees. The Council of Europe Convention on preventing and  
97 combating violence against women and domestic violence is the first European instrument  
98 that aims to legally prevent or legislate for the prevention of gender-based violence. It aims  
99 to protect victims of violence and punish perpetrators of domestic violence. It provides a  
100 framework of measures to prevent and combat domestic violence at international and  
101 national levels. These include raising awareness, data collection, legislation, training,  
102 education, and improvement of resources. As of January 2024, the Convention has been  
103 signed by all EU Member States and ratified by 22 states [2]. In Ireland, domestic violence is  
104 dealt with in both criminal and civil law. The first significant legislation in Ireland regarding  
105 domestic violence was included in the Family Law (Maintenance of Spouses and Children) Act  
106 1976 which provided statutory entitlement to apply for a barring order. Following this, the  
107 Family Law (Protection of Spouses and Children) Act 1981 was introduced and provided for  
108 protection orders. In 1996, the Domestic Violence Act introduced the safety order which was  
109 effectively a more permanent protection order. In more recent years, The Domestic Violence  
110 Act 2018 improved domestic violence legislation in Ireland, consolidated existing law on  
111 domestic violence and provided additional protections. This legislation also introduced two  
112 new criminal offences: forced marriage and coercive control [3].

113 A European Union Agency for Fundamental Rights (FRA) study found that just over one in five  
114 women experienced domestic violence in the European Union [4]. Globally, almost one in  
115 three women are subjected to intimate partner violence at least once in their lives [5]. The  
116 lockdown restrictions during the Covid-19 pandemic further compounded this issue, leaving  
117 women more isolated and made it more difficult to seek assistance and access pathways to  
118 safety [6]. Pregnancy and the postpartum period are identified as times of increased risk of  
119 domestic violence as this is often when violence first occurs or escalates [1]. A systematic  
120 review and meta-analysis on the worldwide prevalence of domestic violence in pregnancy  
121 found that there is variance in the rates of domestic violence reported [7]. The review found  
122 that this is due to the use of various definitions of domestic violence, the measurement  
123 strategy, and the socio-cultural context of the population studied [7]. The authors found that  
124 the global prevalence rate of domestic violence in pregnancy was 25.0% (95% CI 20.4–30.7).  
125 Prevalence figures were higher in Africa (36.1%, 95% CI 27.7–45.4) than in Asia (32.1%, 95%  
126 CI 22.7–43.2), and in South America (25.6%, 95% CI 21.1–30.7) and North America (20.4%,  
127 95% CI 6.9–47.1). The lowest prevalence was reported for Europe (5.1%, 95% CI 3.4–7.5) [7].  
128 This review retrieved data from over 50 countries and found that overall, one in ten mothers  
129 were exposed to physical violence, one in five to psychological violence and one in twenty to  
130 sexual violence [7].

131 In 2021, in Ireland, a total of 152 women reported to Women’s Aid that they had been abused  
132 in pregnancy, while 41 had suffered a miscarriage due to domestic violence [8]. Domestic  
133 violence in pregnancy may lead to mortality and/or lifelong multiple morbidities for both the  
134 woman and fetus; these include but are not limited to, first and second trimester miscarriage,  
135 placental abruption, preterm labour, low birth weight infant, depression, and anxiety [9].

136 Women's increased contact with healthcare professionals during pregnancy offers a unique  
137 opportunity to identify and support those who are experiencing domestic violence. Research  
138 demonstrates that a protocol of routinely asking all women if they are experiencing domestic  
139 violence in pregnancy supports women to disclose and seek supports [10, 11, 12]. Screening  
140 aims to identify women who have experienced or are currently experiencing domestic  
141 violence and to offer interventions [13]. The World Health Organisation (WHO) recommends  
142 that healthcare professionals enquire about domestic violence in the peripartum period [14].  
143 Whilst a Cochrane review found insufficient evidence to recommend asking all women about  
144 domestic violence in healthcare settings, it did state that screening may be beneficial and that  
145 healthcare professionals should be trained to ask women who show signs of abuse or those  
146 in high-risk groups and provide them with a supportive response and information [13]. There  
147 are many validated screening tools used globally, the most common tools tested are the  
148 Abuse Assessment Screen, Woman Abuse Screening Tool, and the HITS (Hurts, Insults,  
149 Threaten, Scream) tool [15]. However, there is a lack of consensus regarding the types of tools  
150 used, the frequency and timing of enquiry, and the response/referral pathways across  
151 healthcare professions [16,17].

152 Midwives, public health nurses, doctors, and medical social workers are in the unique position  
153 of having regular contact with women during pregnancy, labour and birth and the postnatal  
154 period. Research has highlighted a lack of consistent domestic violence education with many  
155 healthcare professionals lacking confidence and feeling unprepared to screen for and respond  
156 to disclosures of violence [16, 18, 19, 20, 21]. Previous research in this area has mainly focused  
157 on barriers to women disclosing domestic violence [15, 22]. While there is some research  
158 regarding the role and experiences of health care professionals such as midwives, doctors and  
159 nurses [18,20] little is understood about the collective experience of maternity care

160 professionals who screen for and respond to domestic violence in the peripartum period. This  
161 qualitative evidence synthesis (QES) aims to integrate the findings from studies that explore  
162 the experiences of the relevant maternity healthcare professionals and identify what enables  
163 them to feel more prepared to enquire about and respond to women's disclosures of  
164 domestic violence. The findings of this QES will deepen understanding of the collective  
165 experiences of maternity care providers in this situation and aid in identifying potential gaps  
166 in clinical practice and education around this important issue.

167

## 168 **Protocol**

### 169 **Inclusion criteria**

170 The SPIDER (sample, phenomenon of interest, design, evaluation, and research type) tool is  
171 used to develop the key concepts and the inclusion criteria in this QES.

172 **Sample:** Maternity health care professionals who provide peripartum care. These include  
173 midwives, obstetric nurses, public health nurses, community nurses, doctors, general  
174 practitioners, obstetricians, medical social workers/social workers.

175 **Phenomenon of Interest:** Maternity care professionals' experiences of screening for and  
176 responding to disclosures of domestic violence in the peripartum period.

177 **Design:** Qualitative studies of any design will be included. Mixed method design studies where  
178 qualitative data can be extracted and any studies that provide qualitative data, such as  
179 responses to open-ended questions in surveys, will also be considered for inclusion.



180 **Evaluation:** Analytical themes that depict maternity health care professionals' experience of  
181 screening for and responding to disclosures of domestic violence in the peripartum period.

182 **Research type:** English language, published, peer reviewed qualitative studies, and mixed  
183 methods or quantitative studies where qualitative data can be extracted separately will be  
184 considered for inclusion.

185

186

187

188

189

190

191

192

193

194

195

196

197

198

**Table 1 Search terms**

|                               |                                                                                                                                                                                                                                                                                                                                                                                                                                                                                                                                                                                                                       |
|-------------------------------|-----------------------------------------------------------------------------------------------------------------------------------------------------------------------------------------------------------------------------------------------------------------------------------------------------------------------------------------------------------------------------------------------------------------------------------------------------------------------------------------------------------------------------------------------------------------------------------------------------------------------|
| <b>Sample</b>                 | maternity care professional*OR healthcare professional* midwife* OR obstetric nurse* OR doctor* OR general practitioner* OR obstetrician* OR public health nurse*OR community nurse* OR social worker* OR medical social worker* OR social worker* OR peripartum* OR pregnan* OR antenatal*, prenatal*OR pre-natal* OR perinatal* OR perinatal* OR postnatal* OR post-natal* OR post-partum* OR post partum                                                                                                                                                                                                           |
| <b>Phenomenon of Interest</b> | (screening* OR questio* OR enquir* OR ask*) (disclos* OR respons* OR respon* OR tel*) (domestic violen* OR domestic violen and abuse* OR intimate partner violen* OR intimate partner abuse* OR domestic abuse* OR gender-based violen* OR gender based violen*)                                                                                                                                                                                                                                                                                                                                                      |
| <b>Design</b>                 | ("qualitativ*" OR "qualitative stud*" OR "qualitative analysis" OR "qualitative method*" OR "focus group*" OR interview* OR "narrative*" OR "grounded theor*" OR "phenomenol*" OR "ethnograph*" OR "purposive sampl*" OR "theoretical sampl*" OR "thematic analysis" OR "content analysis" quantitativ* OR quantitativ* stud* OR observation* stud* OR "cross-sectional stud*" OR "discourse analysis" OR "survey*" OR "open-ended survey*" OR "action research" OR "participatory research" OR "mixed model" OR "mixed method*" OR "mixed design*" OR "multiple method*" OR multimethod* OR "open-ended interview*") |
| <b>Evaluation</b>             | (experien* OR view* OR percept* OR perceiv* OR believ*OR belief* OR perspective* OR thought* OR think* OR feel* OR attitud*)                                                                                                                                                                                                                                                                                                                                                                                                                                                                                          |
| <b>Research Type</b>          | published studies in the English language                                                                                                                                                                                                                                                                                                                                                                                                                                                                                                                                                                             |

204 **Search strategy and study selection**

205 Key guidance on the search strategy and inclusion process for QES details seven steps, the “7  
206 S” approach [23]. This approach prompts the reviewer to consider the following- sampling of  
207 papers, sources, structured questions, search procedures, search strategies and  
208 methodological filters, supplementary searches, and strategies for reporting searches. An  
209 initial scoping search of CINAHL, MEDLINE and EMBASE was conducted to identify relevant  
210 studies for inclusion and further develop appropriate search terms. Search terms have been  
211 developed using the SPIDER acronym and will be adapted for each database searched (Table  
212 1).

213 The following subject-appropriate bibliographic databases will be systematically searched for  
214 relevant studies: ASSIA, CINAHL, EMBASE, Maternity and Infant Care, MEDLINE, PsycINFO and  
215 SocINDEX. Several supplementary strategies to retrieve all relevant research will be  
216 conducted. These include reference checking of included studies, handsearching of journals  
217 and, when appropriate, contact with subject experts and authors in the field of domestic  
218 violence. Databases such as OpenGrey, GreyLit and GreyNet will also be searched to retrieve  
219 relevant grey literature. There will be no date restrictions applied during searches in order to  
220 include any seminal pieces of research. There will be no restrictions applied on geographic  
221 location or country of origin, however only English language articles will be included as we  
222 will not have access to translation services.

223 The retrieved citations will be exported to Endnote (version EN21) and duplicates will be  
224 removed. The remaining citations will be uploaded to Covidence, a screening and data  
225 extraction software tool to screen for eligibility. Twenty percent of selected studies’ titles and  
226 abstracts will be independently reviewed by two reviewers to assess if they meet the inclusion

227 criteria [24]. This step will aid in ensuring that there is an agreed and shared understanding  
228 of the criteria among reviewers. Once an agreement has been reached on the application of  
229 the inclusion criteria, screening of the remaining citations will take place. Screening will be a  
230 two-stage process including title and abstract screening and full text screening and review.  
231 Title and abstracts will be screened by two independent reviewers against the inclusion  
232 criteria. Following this, the full text of potentially relevant studies will be reviewed. Any  
233 disagreements that arise will be resolved through discussion until consensus is achieved or  
234 through an additional review by a third reviewer. The reasons for exclusion of studies  
235 reviewed at full text will be recorded in the final QES. The results of the search and the  
236 screening process will be reported in the final QES and presented in a Preferred Reporting  
237 Items for Systematic Reviews and Meta-analyses (PRISMA) flow diagram [25].

238

### 239 **Assessment of methodological quality**

240 The assessment of methodological quality of included studies and the use of appraisal tools  
241 in QES is becoming increasingly popular [26]. Assessment of methodological quality of studies  
242 included in a QES can provide useful information on the robustness of the conduct of studies  
243 and the credibility of conclusions and increase understanding of the transferability of the  
244 findings [27]. The decision of which appraisal tool to use depends on the objectives of the  
245 QES, time, resources, and the expertise of the researcher [28]. The Critical Skills Appraisal  
246 Programme (CASP, 2018) qualitative studies tool, which uses 10 questions, will be used to  
247 assess methodological quality of included studies (Table 2). Two reviewers will independently  
248 assess all included studies. Consensus will be reached following discussion between the  
249 reviewers or assessment by a third reviewer, if required. All screened studies will undergo

250 data extraction and synthesis as the findings from all included studies, irrespective of their  
251 methodological quality, may be applicable to the aim of the review.

252

253 **Table 2 Criteria for methodological quality assessment (CASP, 2018)**

|                                                                                         |                   |
|-----------------------------------------------------------------------------------------|-------------------|
| 1. Was there a clear statement of the aims of the research?                             | Yes/No/Can't Tell |
| 2. Is a qualitative methodology appropriate?                                            | Yes/No/Can't Tell |
| 3. Was the research design appropriate to address the aims of the research?             | Yes/No/Can't Tell |
| 4. Was the recruitment strategy appropriate to the aims of the research?                | Yes/No/Can't Tell |
| 5. Was the data collected in a way that addressed the research issue?                   | Yes/No/Can't Tell |
| 6. Has the relationship between researcher and participants been adequately considered? | Yes/No/Can't Tell |
| 7. Have ethical issues been taken into consideration?                                   | Yes/No/Can't Tell |
| 8. Was the data analysis sufficiently rigorous?                                         | Yes/No/Can't Tell |
| 9. Is there a clear statement of findings?                                              | Yes/No/Can't Tell |
| 10. How valuable is the research?                                                       | Yes/No/Can't Tell |

254

255

## 256 **Data extraction and synthesis**

257 A purposively designed data extraction form will be created. This form will include  
258 information regarding the population studied, the characteristics of the study, the study  
259 context, the methods, and methodology used, details regarding recruitment, data collection  
260 methods and details regarding data analysis. Data extraction will be a two-stage process.  
261 First, the contextual data will be extracted. The second stage of data extraction involves  
262 extraction of the findings from each individual study, these will be organised systematically  
263 to enable data synthesis and analysis [29]. The thematic synthesis approach developed by  
264 Thomas and Harden will be used for data synthesis [30]. The synthesis will be performed in  
265 three sequential stages that may overlap to some degree: 1) line by line coding of data from

266 primary studies, 2) development of descriptive themes, and 3) generating analytical themes.  
267 The first stage, coding, will be conducted independently by two review authors. These codes  
268 will be grouped into descriptive themes and following discussion within the review team  
269 analytical themes will be identified.

270

## 271 **Assessing confidence in the findings**

272 It is important to assess both the quality of individual studies and the level of confidence in  
273 the evidence generated from the review of qualitative research. The QES findings will be  
274 assessed using the Grading of Recommendations Assessment, Development and Evaluation-  
275 Confidence in the Evidence from Reviews of Qualitative research (GRADE-CERQual) tool [23].  
276 GRADE-CERQual is based on assessment of four components: methodological limitations,  
277 coherence, adequacy of data, and relevance, and overall assessment of each component will  
278 be classified as high, moderate, low or very low as per the CERQual tool [23].

279

## 280 **Study status**

281 The protocol has been registered on PROSPERO CRD42023464776. Initial scoping searches  
282 have been conducted. The proposed date for completion is January 2025.

## 283 **Ethical Approval**

284 As this is a protocol for a qualitative evidence synthesis, ethical approval is not applicable.

285

286

287 **Discussion**

288 Research has shown that most women are in favour of routine questioning if asked in a  
289 sensitive manner and by a well-trained health professional. It has been argued that such an  
290 approach leads to increased rates of disclosure [31, 32]. Previous research has mainly focused  
291 on barriers to women disclosing domestic violence. These barriers include shame, stigma, fear  
292 of judgement or not being believed and confidentiality concerns [13,22]. There is a lack of  
293 exploration of the collective experience of maternity healthcare professionals who screen for  
294 and respond to domestic violence, particularly their education and preparedness for this in  
295 clinical practice. Despite the evidence to suggest that screening is useful in identifying  
296 domestic violence [13] it appears that healthcare professionals may not always feel prepared  
297 to ask and respond to or respond effectively to a disclosure [33,34]. For example, in two  
298 studies conducted with healthcare professionals, doctors and nurses reported receiving little  
299 or no training in responding to domestic violence [35,36]. Research has found how challenging  
300 it can be for a healthcare professional to ask women about a history of domestic violence,  
301 either routinely or if a risk is identified [11]. Healthcare professionals identified a lack of  
302 knowledge, education and feeling unsupported, unprepared, and unconfident when  
303 screening for domestic violence as significant challenges in clinical practice. Previous studies  
304 also identified a lack of implementation of consistent guidelines, and lack of knowledge of the  
305 services or referrals that were available as barriers to healthcare professionals screening for  
306 domestic violence (16,37,38] Henriksen et al in their study, highlighted a lack of motivation  
307 by health professionals to screen women, due to a feeling of insecurity regarding what to do  
308 if violence was disclosed [39].

309 To our knowledge, this QES will be the first to synthesise qualitative data on the collective  
310 experiences and preparedness of maternity healthcare professionals in screening for and  
311 responding to domestic violence in the peripartum period. This QES aims to focus on what  
312 enables maternity healthcare professionals to feel prepared to enquire and respond to  
313 disclosures of domestic violence and to identify any professional discipline specific  
314 educational and clinical requirements.

315

### 316 **Reflexivity statement**

317 There is increasing recognition that reflexivity is an essential component of qualitative  
318 research [40]. Reflexivity is a process of continuous, collaborative practices that researchers  
319 adopt to consciously critique, appraise, and evaluate how their background or subjectivity  
320 may influence the research process [40]. This QES will utilise a reflective approach throughout  
321 the research process. To enhance the trustworthiness of the findings, a research diary will be  
322 kept documenting the process, reviewers will have frequent discussions regarding descriptive  
323 and analytical themes and quotations from primary studies will be included to support the  
324 findings of the review [41].

325

### 326 **Authors' Contributions**

327 LOS will undertake this QES as part of her PhD project. LOS conceptualised the review  
328 question under supervision of DD and MC. LOS, DD and MC had active roles in contributing to  
329 the design of the QES protocol. LOS drafted the protocol manuscript. DD and MC contributed  
330 to the writing through review and editing.



331 **Supporting Information**

332 Open Science Framework: Prisma-P checklist for Maternity care professionals' preparedness  
333 for and experiences of screening and responding to disclosures of domestic violence in the  
334 peripartum period: a protocol for a qualitative evidence synthesis.

335

336

337

338

339

340

341

342

343

344

345

346

347

348

349

350

351

352 **References**

- 353 1. World Health Organisation. Understanding and addressing violence against women:  
354 Health consequences. World Health Organization Geneva; 2012 Available from:  
355 <https://www.who.int/publications/i/item/WHO-RHR-12.43>
- 356 2. European Parliament. EU accession to the Council of Europe Convention on  
357 preventing and combating violence against women ('Istanbul Convention'):  
358 Legislative train schedule 2024 Available from:  
359 [https://www.europarl.europa.eu/legislative-train/theme-a-new-push-for-european-](https://www.europarl.europa.eu/legislative-train/theme-a-new-push-for-european-democracy/file-eu-accession-to-the-istanbul-convention)  
360 [democracy/file-eu-accession-to-the-istanbul-convention](https://www.europarl.europa.eu/legislative-train/theme-a-new-push-for-european-democracy/file-eu-accession-to-the-istanbul-convention)
- 361 3. Legal Aid Board . Domestic violence - coercive control 2021 Available from:  
362 [https://www.legalaidboard.ie/en/about-the-board/press-publications/legal-](https://www.legalaidboard.ie/en/about-the-board/press-publications/legal-ease/legal-ease-volume-5-issue-8-april-2021.pdf)  
363 [ease/legal-ease-volume-5-issue-8-april-2021.pdf](https://www.legalaidboard.ie/en/about-the-board/press-publications/legal-ease/legal-ease-volume-5-issue-8-april-2021.pdf)
- 364 4. European Union Agency for Fundamental Rights. Violence against women: An EU-  
365 wide survey. Main Results Report European Union Agency for Fundamental Rights.  
366 Violence 2023 Available from: [https://fra.europa.eu/en/publication/2014/violence-](https://fra.europa.eu/en/publication/2014/violence-against-women-eu-wide-survey-main-results-report)  
367 [against-women-eu-wide-survey-main-results-report](https://fra.europa.eu/en/publication/2014/violence-against-women-eu-wide-survey-main-results-report)
- 368 5. World Health Organisation. Violence against women prevalence estimates World  
369 Health Organization Geneva; 2018 Available from:  
370 <https://www.who.int/publications/i/item/9789240022256>
- 371 6. Dawsey-Hewitt S, Jnagel T, Kalia S, Royal K, Seshadri S, Sutherland L. Shining a light  
372 on domestic abuse during covid Women’s Aid Federation ; 2021 Available from:  
373 [https://www.womensaid.org.uk/wp-](https://www.womensaid.org.uk/wp-content/uploads/2021/11/Shadow_Pandemic_Report_FINAL.pdf)  
374 [content/uploads/2021/11/Shadow\\_Pandemic\\_Report\\_FINAL.pdf](https://www.womensaid.org.uk/wp-content/uploads/2021/11/Shadow_Pandemic_Report_FINAL.pdf)
- 375 7. Román-Gálvez RM, Martín-Peláez S, Fernández-Félix BM, Zamora J, Khan KS, Bueno-  
376 Cavanillas A. Worldwide prevalence of intimate partner violence in pregnancy. A  
377 systematic review and meta-analysis. *Frontiers in Public Health*. 2021 Aug 30;9.  
378 doi:10.3389/fpubh.2021.738459
- 379 8. Women’s Aid. Women’s Aid Annual Impact Report 2022 Available from:  
380 [https://www.womensaid.ie/app/uploads/2023/06/Womens-Aid-Annual-Impact-](https://www.womensaid.ie/app/uploads/2023/06/Womens-Aid-Annual-Impact-Report-2022.pdf)  
381 [Report-2022.pdf](https://www.womensaid.ie/app/uploads/2023/06/Womens-Aid-Annual-Impact-Report-2022.pdf)
- 382 9. Kenny N, Ní Riain A, Daly M,. Domestic violence: A guide for general practice: Quick  
383 reference guide Irish College General Practitioners; 2014 Available from:  
384 <http://hdl.handle.net/10147/142728>
- 385 10. Salmon D, Murphy S, Baird K, Price S. An evaluation of the effectiveness of an  
386 educational programme promoting the introduction of routine antenatal enquiry for  
387 domestic violence. *Midwifery*. 2006 Mar;22(1):6–14.  
388 doi:10.1016/j.midw.2005.05.002
- 389 11. Baird KM, Saito AS, Eustace J, Creedy DK. An exploration of Australian  
390 midwives’knowledge of intimate partner violence against women during pregnancy.  
391 *Women and Birth*. 2015 Sept;28(3):215–20. doi:10.1016/j.wombi.2015.01.009
- 392 12. Taft AJ, Hooker L, Humphreys C, Hegarty K, Walter R, Adams C, et al. Maternal and  
393 child health nurse screening and care for Mothers Experiencing Domestic Violence  
394 (move): A cluster randomised trial. *BMC Medicine*. 2015 Jun 25;13(1).  
395 doi:10.1186/s12916-015-0375-7

- 396 13. O’Doherty L, Hegarty K, Ramsay J, Davidson LL, Feder G, Taft A. Screening women for  
397 intimate partner violence in healthcare settings. *Cochrane Database of Systematic*  
398 *Reviews*. 2015 Jul 22;2015(8). doi:10.1002/14651858.cd007007.pub3
- 399 14. World Health Organisation. Responding to intimate partner violence and sexual  
400 violence against women World Health Organization Geneva; 2013 Available from:  
401 <https://www.who.int/publications/i/item/9789241548595>
- 402 15. Hussain N, Sprague S, Madden K, Hussain FN, Pindiprolu B, Bhandari M. A  
403 comparison of the types of screening tool administration methods used for the  
404 detection of intimate partner violence. *Trauma, Violence, & Abuse*. 2013 Dec  
405 15;16(1):60–9. doi:10.1177/1524838013515759
- 406 16. Eustace J, Baird K, Saito AS, Creedy DK. Midwives’ experiences of routine enquiry for  
407 intimate partner violence in pregnancy. *Women and Birth*. 2016 Dec;29(6):503–10.  
408 doi:10.1016/j.wombi.2016.04.010
- 409 17. Kirk L, Bezzant K. What barriers prevent health professionals screening women for  
410 domestic abuse? A literature review. *British Journal of Nursing*. 2020 Jul  
411 9;29(13):754–60. doi:10.12968/bjon.2020.29.13.754
- 412 18. Bradbury-Jones C, Broadhurst K. Are we failing to prepare nursing and midwifery  
413 students to deal with domestic abuse? findings from a qualitative study. *Journal of*  
414 *Advanced Nursing*. 2015 Apr 27;71(9):2062–72. doi:10.1111/jan.12666
- 415 19. Lawlor R. Conspicuous invisibility: A grounded theory approach to exploring the  
416 discovery and disclosure of violence against women attending General Practice  
417 [thesis] Dublin City University; 2014 Available from:  
418 <https://www.lenus.ie/handle/10147/316150>
- 419 20. O’Shea MT, Collins C, Ailis NR, Daly MDr. Domestic violence during pregnancy: GP  
420 survey report Irish College General Practitioners ICGP; 2016 Available from:  
421 <http://hdl.handle.net/10147/614395>
- 422 21. Webster J. An exploration of the views and experiences of midwives who routinely  
423 screen for domestic violence in an Irish antenatal setting *Midwifery Digest* 2018.  
424 Available from:  
425 [https://bib.vinci.be/opac\\_css/index.php?lvl=notice\\_display&id=272642](https://bib.vinci.be/opac_css/index.php?lvl=notice_display&id=272642)
- 426 22. García-Moreno C, Hegarty K, d’Oliveira AF, Koziol-McLain J, Colombini M, Feder G.  
427 The health-systems response to violence against women. *The Lancet*. 2015  
428 Apr;385(9977):1567–79. doi:10.1016/s0140-6736(14)61837-7
- 429 23. Booth A, Lewin S, Glenton C, Munthe-Kaas H, Toews I, Noyes J, et al. Applying grade-  
430 CERQUAL to qualitative evidence synthesis findings—paper 7: Understanding the  
431 potential impacts of dissemination bias. *Implementation Science*. 2018 May 4;13(S1).  
432 doi:10.1186/s13012-017-0694-5
- 433 24. McDonagh M. Avoiding bias in selecting studies U.S. National Library of Medicine;  
434 2013 Available from:  
435 <https://www.ncbi.nlm.nih.gov/books/NBK126701/?report=classic>
- 436 25. Page MJ, McKenzie JE, Bossuyt PM, Boutron I, Hoffmann TC, Mulrow CD, et al. The  
437 Prisma 2020 statement: An updated guideline for reporting systematic reviews. *BMJ*.  
438 2021 Mar 29; doi:10.1136/bmj.n71

- 439 26. Hannes K, Macaitis K. A move to more systematic and transparent approaches in  
440 qualitative evidence synthesis: Update on a review of published papers. *Qualitative*  
441 *Research*. 2012 May 11;12(4):402–42. doi:10.1177/1468794111432992
- 442 27. Whiting P, Wolff R, Mallett S, Simera I, Savović J. A proposed framework for  
443 developing Quality Assessment Tools. *Systematic Reviews*. 2017 Oct 17;6(1).  
444 doi:10.1186/s13643-017-0604-6
- 445 28. Majid U, Vanstone M. Appraising qualitative research for evidence syntheses: A  
446 compendium of Quality Appraisal Tools. *Qualitative Health Research*. 2018 Jul  
447 26;28(13):2115–31. doi:10.1177/1049732318785358
- 448 29. Noyes J, Booth A., Cargo M, Flemming K., Harden A., Harris J, Garside R, Hannes K,  
449 Pantoja T, Thomas J. *Cochrane Handbook for Systematic Reviews of interventions*  
450 *Cochrane Library* ; 2023 Available from: <https://training.cochrane.org/handbook>
- 451 30. Thomas J, Harden A. Methods for the thematic synthesis of qualitative research in  
452 systematic reviews. *BMC Medical Research Methodology*. 2008 Jul 10;8(1).  
453 doi:10.1186/1471-2288-8-45
- 454 31. Mezey G. Midwives' perceptions and experiences of routine enquiry for domestic  
455 violence. *BJOG: An International Journal of Obstetrics and Gynaecology*. 2003  
456 Aug;110(8):744–52. doi:10.1016/s1470-0328(03)01263-1
- 457 32. Branjerdporn G, Clonan T, Boddy J, Gillespie K, O'Malley R, Baird K. Australian  
458 women's perspectives of routine enquiry into domestic violence before and after  
459 birth. *BMC Pregnancy and Childbirth*. 2023 Jan 19;23(1). doi:10.1186/s12884-023-  
460 05345-7
- 461 33. Gregory A, Ramsay J, Agnew-Davies R, Baird K, Devine A, Dunne D, et al. Primary care  
462 identification and referral to improve safety of women experiencing domestic  
463 violence (IRIS): Protocol for a pragmatic cluster randomised controlled trial. *BMC*  
464 *Public Health*. 2010 Feb 2;10(1). doi:10.1186/1471-2458-10-54
- 465 34. McGarry J, Nairn S. An exploration of the perceptions of emergency department  
466 nursing staff towards the role of a domestic abuse nurse specialist: A qualitative  
467 study. *International Emergency Nursing*. 2015 Apr;23(2):65–70.  
468 doi:10.1016/j.ienj.2014.06.003
- 469 35. Rimmer A. Domestic violence is poorly covered in medical training, study finds.  
470 *British Medical Journal*. 2017 Oct 11 (359); <https://doi.org/10.1136/bmj.j4646>
- 471 36. Taft A, Broom DH, Legge D. General practitioner management of intimate partner  
472 abuse and the whole family: Qualitative study. *British Medical Journal* . 2004 Feb  
473 6;328(7440):618. doi:10.1136/bmj.38014.627535.0b
- 474 37. Finnbogadóttir H, Dykes A-K. Midwives' awareness and experiences regarding domestic  
475 violence among pregnant women in Southern Sweden. *Midwifery*. 2012 Apr;28(2):181–9.  
476 doi:10.1016/j.midw.2010.11.010
- 477 38. Mauri EM, Nespoli A, Persico G, Zobbi VF. Domestic violence during pregnancy:  
478 Midwives' experiences. *Midwifery*. 2015 May;31(5):498–504.  
479 doi:10.1016/j.midw.2015.02.002
- 480 39. Henriksen L, Garnweidner-Holme LM, Thorsteinsen KK, Lukasse M. 'it is a difficult  
481 topic' – a qualitative study of midwives' experiences with routine antenatal enquiry

- 482 for intimate partner violence. BMC Pregnancy and Childbirth. 2017 Jun 2;17(1).  
483 doi:10.1186/s12884-017-1352-2
- 484 40. Olmos-Vega FM, Stalmeijer RE, Varpio L, Kahlke R. A practical guide to reflexivity in  
485 Qualitative Research: A mee guide no. 149. Medical Teacher. 2022 Apr 7;45(3):241–  
486 51. doi:10.1080/0142159x.2022.2057287
- 487 41. Barrett A, Kajamaa A, Johnston J. How to ... be reflexive when conducting qualitative  
488 research. The Clinical Teacher. 2020 Jan 23;17(1):9–12. doi:10.1111/tct.13133

489

490

491
